# Supplementary material
Source: Springer Nature journal article supplement (https://www.springermedizin.de/resource/supplementary/12885_2013_3888_MOESM3_ESM.pdf/9464610)
Supplement: MOESM3 [file 9464610]

A

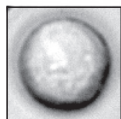

Day 1

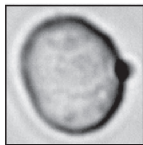

Day 2

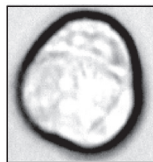

Day 3

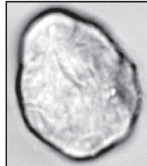

Day 4

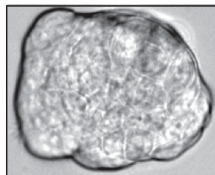

Day 6

B

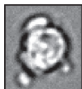

Day 1

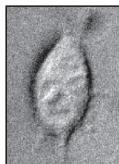

Day 2

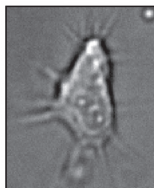

Day 3

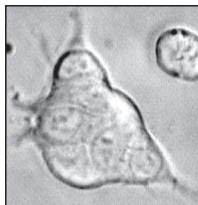

Day 4

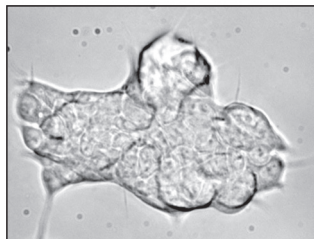

Day 6

C

| Cell Line        | LIM 2551          | HCT-116      | LIM 1899     | LIM 1215        | HT29            |
|------------------|-------------------|--------------|--------------|-----------------|-----------------|
| %Flat            | 57.39 (3.17)      | 53.23 (3.60) | 45.50 (3.22) | 45.29 (5.00)    | 39.82 (2.19)    |
| $\beta$ -Catenin | WT                | $\Delta$ S45 | S45P         | WT              | WT              |
| APC              | $\Delta$ A5 toA76 | WT           | WT           | T41A/Q177/Q177P | E853X/T1556fsX3 |
| p53              | WT/stop at aa 49  | WT           | WT           | WT              | R273H           |
| K-Ras            | WT                | G13D         | WT/G12A      | WT              | WT              |
| B-Raf            | V600E             | WT           | WT           | WT              | V600E           |
| PI3K             | WT                | H1047R       | WT           | WT              | P449T           |
| MS               | MSI               | MSI          | MSS          | MSI             | MSS             |
| Ref.             | Zhang, 2009       | RCGDB        | Zhang, 2009  | Zhang, 2009     | Ikediobi, 2006  |
